# Supplementary material for: Pervasive Platelet Secretion Defects in Patients with Severe Acute Respiratory Syndrome Coronavirus 2 (SARS-CoV-2)
Source: MDPI journal article supplement (doi:10.3390/cells12010193), 2023-01-03
Supplement: s1 [file s1]

**Table S1.** Complete blood counts of the COVID-19 cohort

| Patient      | WBC<br>[*10 <sup>3</sup> /μl] | PLT<br>[*10 <sup>9</sup> /μl] | RBC<br>[10 <sup>6</sup> /μl] | HGB<br>[g/dl] | HCT<br>[%] | MCV<br>[fl] | MCH<br>[pg] | MCHC<br>[g/dl] |
|--------------|-------------------------------|-------------------------------|------------------------------|---------------|------------|-------------|-------------|----------------|
| 1            | 8.12                          | 95                            | 2.55                         | 7.7           | 22         | 86.3        | 30.2        | 35.0           |
| 2            | 51.5                          | 159                           | 2.24                         | 6.8           | 21.1       | 94.2        | 30.4        | 32.2           |
| 3            | 14.57                         | 208                           | 2.59                         | 7.8           | 25.2       | 97.3        | 30.1        | 31.0           |
| 4            | 15.17                         | 360                           | 2.46                         | 7.4           | 21.8       | 88.6        | 30.1        | 33.9           |
| 5            | 13.52                         | 278                           | 3.35                         | 9.3           | 28.3       | 84.5        | 27.8        | 32.9           |
| 6            | 17.32                         | 120                           | 2.5                          | 7.5           | 22.3       | 89.2        | 30.0        | 33.6           |
| 7            | 12.38                         | 80                            | 2.34                         | 7.0           | 19.0       | 81.2        | 29.9        | 36.8           |
| 8            | 10.20                         | 172                           | 2.57                         | 7.7           | 23.1       | 89.9        | 30.0        | 33.3           |
| 9            | 8.52                          | 188                           | 2.4                          | 7.6           | 24.2       | 100.8       | 31.7        | 31.4           |
| 10           | 8.49                          | 100                           | 2.82                         | 8.4           | 23.1       | 81.9        | 29.8        | 36.4           |
| 11           | 10.4                          | 231                           | 4.28                         | 12.2          | 35.6       | 83.2        | 28.5        | 34.3           |
| 12           | 14.54                         | 141                           | 3.01                         | 9.0           | 27.6       | 91.7        | 29.9        | 32.6           |
| 13           | 4.98                          | 36                            | 2.64                         | 7.8           | 23.8       | 90.2        | 29.5        | 32.8           |
| Normal range | 3.9-9.8                       | 146-328                       | 4.5-5.8                      | 13.5-17.6     | 39,6-50,6  | 80-95.5     | 27.6-32.8   | 32.8-36.6      |

\*WBC: White blood cell count; PLT: Platelet count; RBC: Red blood cell count; HGB: Hemoglobin; HCT: Hematocrit; MCV: Mean corpuscular volume; MCH: Mean corpuscular hemoglobin; MCHC: Mean corpuscular hemoglobin concentration
